# Supplementary material for: Evaluating the degree of substitution of water-insoluble acyl derivatives of hyaluronan using Raman spectroscopy: method development and comparison with gas chromatography and 1H NMR
Source: Royal Society of Chemistry journal article supplement (doi:10.1039/c6ay03067j), 2016-12-01
Supplement: c6ay03067j1.pdf [file c6ay03067j1.pdf]

## SUPPLEMENTARY MATERIAL

### Evaluating the degree of substitution of water-insoluble acyl derivatives of hyaluronan using Raman spectroscopy: method development and comparison with gas chromatography and $^1\text{H}$ NMR

Josef Chmelař,<sup>\*a</sup> Adéla Kotzianová,<sup>ab</sup> Martina Hermannová,<sup>a</sup> Romana Šuláková,<sup>a</sup> Daniela Šmejkalová,<sup>a</sup> Jaromír Kulhánek<sup>a</sup> and Vladimír Velebný<sup>a</sup>

<sup>a</sup> Contipro a.s., Dolní Dobrouč 401, 561 02 Dolní Dobrouč, Czech Republic

<sup>b</sup> Department of Chemistry, Faculty of Science, Masaryk University, Kamenice 5, 625 00 Brno, Czech Republic

\* Corresponding author. Tel.: +420 465 519 580; fax: +420 465 543 793. E-mail address: chmelař@contipro.com.

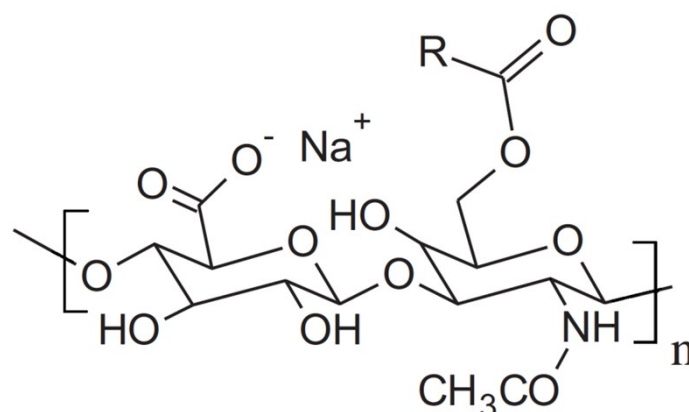

**Fig. S1** Scheme of HA acyl derivative structure denoting a substituted disaccharide unit, where R is the aliphatic side chain of the acyl group and n is the number of repeating disaccharide units.

**Table S1** List of palmitoyl-modified HA oligosaccharides used for calibrating the Raman method.

| Sample                | Description                                | DS / % |
|-----------------------|--------------------------------------------|--------|
| HA <sub>5</sub> -PAL  | 5 repeating units, 1 palmitoyl side-chain  | 20     |
| HA <sub>4</sub> -PAL  | 4 repeating units, 1 palmitoyl side-chain  | 25     |
| HA <sub>3</sub> -PAL  | 3 repeating units, 1 palmitoyl side-chain  | 33     |
| HA <sub>2</sub> -PAL  | 2 repeating units, 1 palmitoyl side-chain  | 50     |
| HA <sub>3</sub> -2PAL | 3 repeating units, 2 palmitoyl side-chains | 67     |
| HA <sub>2</sub> -2PAL | 2 repeating units, 2 palmitoyl side-chains | 100    |

**Table S2** List of palmitoyl-HA standards used for calibrating the  $^1\text{H}$  NMR method.

| <b>Sample</b> | <b><math>M_w</math> / kDa</b> | <b><math>\text{DS}_{\text{GC}}</math> / %</b> | <b><math>\text{DS}_{\text{NMR}}</math> / %</b> |
|---------------|-------------------------------|-----------------------------------------------|------------------------------------------------|
| pHA-cal-1     | 330                           | 8.1                                           | 18                                             |
| pHA-cal-2     | 330                           | 13.7                                          | 31                                             |
| pHA-cal-3     | 330                           | 19.8                                          | 43                                             |
| pHA-cal-4     | 330                           | 25.2                                          | 56                                             |
| pHA-cal-5     | 330                           | 31.2                                          | 67                                             |
| pHA-cal-6     | 330                           | 35.5                                          | 80                                             |
| pHA-cal-7     | 330                           | 45.7                                          | 102                                            |
